# Supplementary material
Source: PubMed Central journal article supplement (PMC5665581)
Supplement: NIHMS824961-supplement.pdf [file NIHMS824961-supplement.pdf]

## Distinct Responses to Predictable and Unpredictable Threat in Anxiety Pathologies: Effect of Panic Attack

### Supplemental information

#### Supplemental Methods and Materials

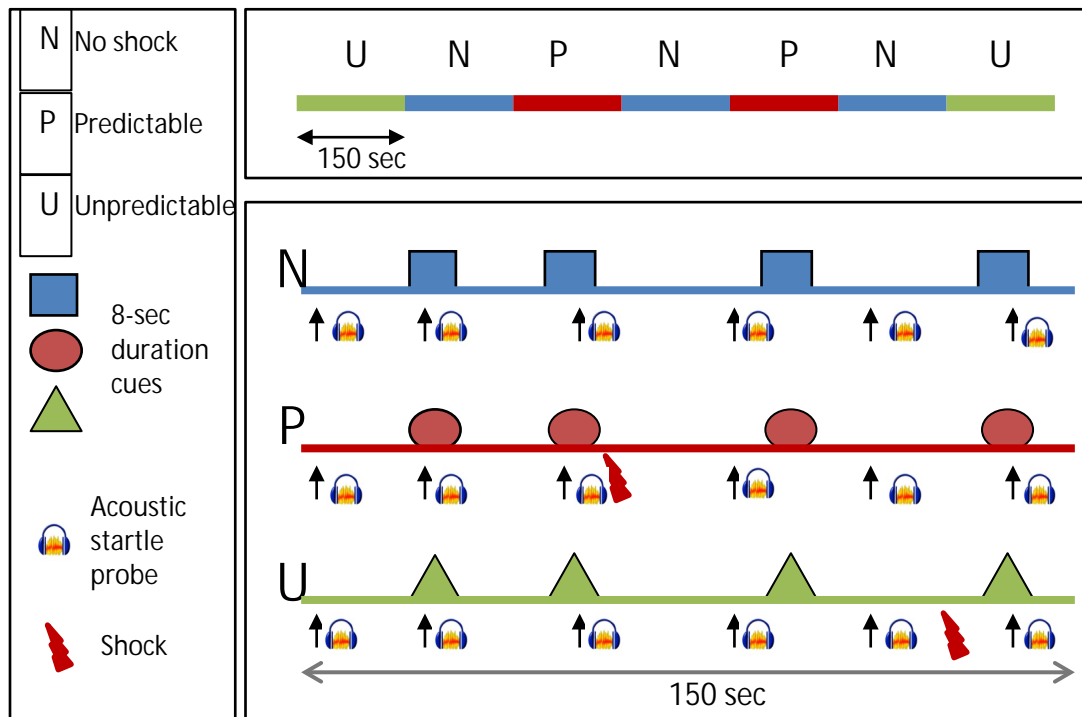

**Figure S1.** Schematic representation of stimulus presentation during each condition in one block of the NPU-threat test. The upper part of the figure represents a complete block including two P (predictable), two U (unpredictable) and three N (no shock) conditions. The lower part shows examples of each condition, including startle probes, cues (8 s duration) and shocks. Reproduced with permission from Grillon *et al.* (1).

## Supplemental Results

### Startle

**Table S1.** Mean (SEM and confidence interval) startle magnitude ( $\mu\text{V}$ ) across conditions in the controls and anxious patients according to the presence or absence of a history of PAs

|                     | Controls                |                          | GAD                       |                           | SAD                      |                           | GAD/SAD                 |                            |
|---------------------|-------------------------|--------------------------|---------------------------|---------------------------|--------------------------|---------------------------|-------------------------|----------------------------|
|                     | No PAs<br>(N=72)        | PAs<br>(N=2)             | No PAs<br>(N=16)          | PAs<br>(N=11)             | No PAs<br>(N=15)         | PAs<br>(N=6)              | No PAs<br>(N=17)        | PAs<br>(N=7)               |
| <b>Habituation</b>  |                         |                          |                           |                           |                          |                           |                         |                            |
| Mean                | 51.3                    | 39.4                     | 87.0                      | 89.8                      | 50.3                     | 69.5                      | 38.6                    | 85.4                       |
| (SEM)               | (5.2)                   | (24.8) -                 | (17.5)                    | (23.3)                    | (10.7)                   | (19.6)                    | (7.5)                   | (25.7)                     |
| Confidence interval | 40.8-61.8               | 276-355                  | 49.6-124.4                | 37.7-142.0                | 10.7-27.5                | 19.0-120.1                | 22.7-54.5               | 22.3-148.4                 |
| <b>Pre-test</b>     | 56.6<br>(6.3) 43-9-69.3 | 57.2<br>(36.0) --400-511 | 85.7<br>(11.6) 60.9-110.5 | 86.1<br>(19.7) 42.2-130.0 | 63.7<br>(12.7) 36.4-91.1 | 78.7<br>(27.4) 8.3-149.1  | 54.5<br>(9.2) 34.9-74.0 | 103.1<br>(40.5) 3.8-202.3  |
| <b>Neutral</b>      |                         |                          |                           |                           |                          |                           |                         |                            |
| <b>ITI</b>          | 31.0<br>(4.1) 22.8-39.3 | 21.4<br>(9.6) -101-144   | 53.7<br>(11.2) 29.8-77.6  | 56.9<br>(20.0) 12.3-101.6 | 29.2<br>(5.8) 16.5-41.8  | 31.7<br>(8.0) 11.1-52.4   | 18.5<br>(3.7) 10.5-26.5 | 59.4<br>(17.9) 15.4-103.4  |
| <b>Cue</b>          | 29.1<br>(3.8) 21.5-36.7 | 25.6<br>(14.5) -158-210  | 52.4<br>(10.2) 30.6-74.3  | 57.2<br>(19.7) 13.2-101.1 | 25.7<br>(5.5) 13.7-37.7  | 32.1<br>(9.8) 6.7-57.5    | 18.3<br>(3.4) 11.4-26.2 | 60.0<br>(19.5) 12.1-107.9  |
| <b>Predictable</b>  |                         |                          |                           |                           |                          |                           |                         |                            |
| <b>ITI</b>          | 37.6<br>(4.2) 29.1-46.2 | 26.0<br>(15.0) -165-217  | 68.1<br>(13.7) 38.8-97.5  | 71.7<br>(20.2) 26.5-116.9 | 34.0<br>(7.7) 17.4-50.6  | 42.1<br>(13.0) 8.5-75.8   | 29.1<br>(4.5) 17.4-40.7 | 71.7<br>(19.9) 40.5-159.7  |
| <b>Cue</b>          | 57.2<br>(5.7) 45.6-68.7 | 62.8<br>(27.2) -283-408  | 93.5<br>(17.5) 56.0-130.9 | 99.5<br>(23.0) 48.0-150.9 | 56.1<br>(8.9) 36.9-75.3  | 81.4<br>(13.8) 45.7-117.2 | 60.0<br>(9.6) 39.6-80.3 | 111.9<br>(26.1) 47.9-175.9 |

|                      | Controls         |                  | GAD              |                | SAD              |                | GAD/SAD          |                 |
|----------------------|------------------|------------------|------------------|----------------|------------------|----------------|------------------|-----------------|
|                      | No PAs<br>(N=72) | PAs<br>(N=2)     | No PAs<br>(N=16) | PAs<br>(N=11)  | No PAs<br>(N=15) | PAs<br>(N=6)   | No PAs<br>(N=17) | PAs<br>(N=7)    |
| <b>Unpredictable</b> | 45.9<br>(5.2)    | 46.3<br>(13.5) - | 80.2<br>(16.2)   | 86.4<br>(22.1) | 40.5<br>(7.3)    | 55.2<br>(11.3) | 36.3<br>(5.7)    | 100.0<br>(24.3) |
| <b>ITI</b>           | 35.4-<br>56.4    | 125-218          | 45.6-<br>114.8   | 37.0-<br>135.9 | 24.8-<br>56.2    | 26.0-<br>84.5  | 24.2-<br>48.4    | 40.5-<br>159.5  |
| <b>Cue</b>           | 50.7<br>(5.7)    | 63.7<br>(37.7) - | 88.2<br>(19.1)   | 92.3<br>(22.8) | 42.2<br>(7.3)    | 67.9<br>(14.6) | 36.8<br>(6.1)    | 88.7<br>(22.5)  |
|                      | 39.7-<br>61.7    | 416-543          | 47.5-<br>128.9   | 41.3-<br>143.2 | 26.5-<br>57.8    | 30.3-<br>105.5 | 23.8-<br>49.7    | 33.6-<br>143.9  |

GAD, generalized anxiety disorder; SAD, social anxiety disorder.

Note that fear-potentiated startle = difference startle magnitudes cue/P condition minus ITI/P condition and anxiety-potentiated startle = difference startle magnitudes ITI/U condition minus ITI/N condition.

**Table S2.** Mean (SEM and confidence interval) startle magnitude (T-scores) across conditions in the controls and anxious patients according to the presence or absence of a history of PAs.

|                      | Controls         |               | GAD              |               | SAD              |               | GAD/SAD          |               |
|----------------------|------------------|---------------|------------------|---------------|------------------|---------------|------------------|---------------|
|                      | No PAs<br>(N=72) | PAs<br>(N=2)  | No PAs<br>(N=16) | PAs<br>(N=11) | No PAs<br>(N=15) | PAs<br>(N=6)  | No PAs<br>(N=17) | PAs<br>(N=7)  |
| <b>Habituation</b>   |                  |               |                  |               |                  |               |                  |               |
| Mean                 | 56.2             | 48.1          | 54.5             | 54.6          | 52.5             | 53.7          | 52.2             | 50.3          |
| (SEM)                | (1.3)            | (2.2)         | (2.5)            | (1.8)         | (2.5)            | (3.7)         | (2.4)            | (3.4)         |
| Confidence interval  | 53.5-59.0        | 19.8-76.4     | 49.0-60.0        | 50.5-58.7     | 47.1-58.0        | 44.2-63.2     | 47.3-57.4        | 41.9-58.7     |
| <b>Pre-test</b>      | 577<br>(1.1)     | 55.7<br>(5.4) | 55.8<br>(2.1)    | 53.6<br>(3.9) | 60.3<br>(2.6)    | 55.5<br>(3.9) | 58.4<br>(3.0)    | 52.5<br>(6.9) |
|                      | 55.5-59.9        | -13.6-125     | 51.1-60.4        | 44.7-62.5     | 54.6-66.1        | 45.3-65.8     | 51.9-65.0        | 35.3-69.6     |
| <b>Neutral</b>       | 43.0<br>(.4)     | 41.0<br>(3.0) | 42.3<br>(1.0)    | 40.3<br>(1.0) | 43.2<br>(.6)     | 42.0<br>(1.3) | 41.8<br>(.7)     | 42.4<br>(.7)  |
| <b>ITI</b>           | 42.1-43.9        | 2.6-79.4      | 40.7-44.6        | 37.9-42.8     | 41.9-44.5        | 38.6-45.4     | 40.3-43.3        | 40.5-44.3     |
|                      | 42.0<br>(.4)     | 42.5<br>(1.5) | 41.4<br>(.8)     | 41.2<br>(1.0) | 41.1<br>(1.0)    | 40.7<br>(1.3) | 42.2<br>(.4)     | 42.8<br>(1.4) |
| <b>Cue</b>           | 41.2-42.9        | 28.1-56.9     | 39.6-43.2        | 38.8-43.6     | 38.9-43.2        | 37.2-44.3     | 41.1-43.3        | 39.2-46.4     |
| <b>Predictable</b>   | 46.7<br>(.4)     | 42.6<br>(1.1) | 47.9<br>(.9)     | 46.7<br>(.9)  | 46.5<br>(1.4)    | 44.5<br>(1.5) | 46.8<br>(.9)     | 47.3<br>(1.8) |
| <b>ITI</b>           | 45.9-47.5        | 31.1-54.1     | 45.9-49.8        | 44.6-48.8     | 43.3-49.6        | 40.5-48.6     | 44.8-48.7        | 42.6-51.9     |
|                      | 57.3<br>(.6)     | 59.7<br>(.2)  | 57.9<br>(1.1)    | 58.8<br>(1.1) | 60.3<br>(1.2)    | 61.5<br>(1.7) | 61.1<br>(1.4)    | 58.6<br>(1.5) |
| <b>Cue</b>           | 56.0-58.3        | 56.8-62.6     | 55.5-60.4        | 56.3-61.2     | 57.5-63.0        | 57.0-66.1     | 58.0-64.3        | 54.9-62.4     |
| <b>Unpredictable</b> | 50.4<br>(.4)     | 53.2<br>(4.4) | 51.3<br>(.9)     | 54.0<br>(1.5) | 51.1<br>(1.3)    | 51.0<br>(1.3) | 51.0<br>(.9)     | 56.0<br>(2.1) |
| <b>ITI</b>           | 49.5-51.3        | -3.7-110      | 49.2-53.4        | 50.6-57.5     | 49.2-53.4        | 47.7-54.4     | 40.0-52.9        | 50.7-61.2     |
|                      | 53.4<br>(.6)     | 58.7<br>(5.4) | 53.7<br>(1.2)    | 54.6<br>(1.1) | 51.3<br>(1.2)    | 55.2<br>(1.6) | 51.5<br>(1.4)    | 51.3<br>(1.5) |
| <b>Cue</b>           | 52.3-54.5        | 10.8-128      | 51.0-56.4        | 52.0-57.1     | 48.6-54.0        | 50.9-59.1     | 48.5-54.5        | 47.4-55.2     |

GAD, generalized anxiety disorder; SAD, social anxiety disorder.

## Retrospective Ratings

Retrospective ratings are shown in Table S3. The rating from one subject was missing.

## Predictable Threat

Ratings during the predictable threat condition were analyzed with a Group (control, GAD, SAD, GAD/SAD) x Stimulus Type (Cue, ITI) rANOVA. Overall fear ratings differed among groups ( $F[3, 139]=12.9, p<.0009$ ), due to higher overall fear rating in the GAD ( $p=.001$ ), SAD ( $p=.004$ ), and GAD/SAD ( $p<.0009$ ) groups compared to control as well as higher fear rating in the GAD/SAD compared to the GAD group ( $p<.02$ ). In addition, subjective fear was higher during the cue compared to ITI in the P condition ( $F[1, 139]=200.9, p<.0009$ ), but this effect did not differ among groups ( $F[3, 139]=.9, ns$ ). When age and sex were used as covariate, the results were similar with the exception that subjective fear was higher in the GAD group compared to the SAD group ( $p<.01$ ).

Rating of fear did not differ among patients with and without a history of PA (PA,  $F[1, 66]=.2, ns$ ; PA x Stimulus Type,  $F[1, 66]=1.2, ns$ ; PA x Diagnostic x Stimulus Type,  $F[1, 66]=1.5, ns$ ).

## Unpredictable Condition

Ratings during the unpredictable threat condition were analyzed with a Group (control, GAD, SAD, GAD/SAD) x Condition (neutral ITI, unpredictable ITI) rANOVA. Overall anxiety ratings during the Unpredictable condition differed among groups ( $F[3, 139]=13.5, p<.0009$ ), due to higher overall anxiety rating in each patient group compared to the control group (all  $p<.05$ ). In addition, subjective anxiety during ITI was higher during the Unpredictable condition compared to the Neutral condition ( $F[1, 139]=456.5, p<.0009$ ), an effect that differed among groups ( $F[3, 139]=3.9, p=.01$ ) and was due to greater increased in anxiety from the neutral to the unpredictable condition in the GAD/SAD group compared to controls ( $p=.01$ ). Rating of anxiety

did not differ among patients with and without a history of PA (no significant main effect of PA or interaction with PA).

**Table S3.** Mean (and SEM) retrospective rating of fear and anxiety during the NPU threat test.

|       | Controls | GAD      | SAD      | GAD/SAD  |
|-------|----------|----------|----------|----------|
| N ITI | 1.5 (.1) | 2.2 (.2) | 2.1 (.2) | 2.7 (.3) |
| Cue   | 1.6 (.1) | 1.9 (.2) | 2.0 (.2) | 2.6 (.3) |
| P ITI | 3.3 (.2) | 4.5 (.3) | 4.8 (.4) | 5.8 (.4) |
| Cue   | 5.1 (.3) | 7.0 (.3) | 6.8 (.4) | 7.9 (.3) |
| U ITI | 5.1 (.3) | 6.5 (.3) | 7.0 (.5) | 7.9 (.4) |
| Cue   | 4.5 (.3) | 5.8 (.5) | 6.4 (.4) | 7.1 (.4) |

GAD, generalized anxiety disorder; SAD, social anxiety disorder.

Overall anxiety ratings during the Unpredictable condition differed among groups ( $F[3, 141]=13.3, p<.0009$ ), due to higher overall anxiety rating in the GAD ( $p<.003$ ), SAD ( $p<.002$ ), and GAD/SAD ( $.0009$ ) groups compared to control as well as higher anxiety rating in the GAD/SAD compared to the GAD ( $p<.02$ ) and GAD/SAD ( $p<.05$ ) groups. In addition, subjective anxiety during ITI was higher during the Unpredictable condition compared to the Neutral condition ( $F[1,141]=462.1, p<.0009$ ), an effect that differed among groups ( $F[3,141]=3.7, p<.03$ ) and was due to higher anxiety rating in the GAD/SAD group compared to controls ( $p<.02$ ). When age and sex were used as covariate, the results remained the same.

Rating of anxiety did not differ among patients with and without a history of PA (PA,  $F[1,66]=.8, ns$ ; PA x Stimulus Type,  $F[1,66]=1.0, ns$ ; PA x Diagnostic x Stimulus Type,  $F[1,66]=.2, ns$ ).

### **Supplemental Reference**

1. Grillon C, Krimsky M, Charney DR, Vytal K, Ernst M, Cornwell B. (2013): Oxytocin increases anxiety to unpredictable threat *Mol Psychiatry* 18: 958-60.
